# Supplementary material for: Enzyme activity and selectivity filter stability of ancient TRPM2 channels were simultaneously lost in early vertebrates
Source: eLife. 2019 Apr 2;8:e44556. doi: 10.7554/eLife.44556 (PMC6461439; doi:10.7554/eLife.44556)
Supplement: Figure 1—source data 1. [file elife-44556-fig1-data1.xlsx]

## Sheet: Fig.1
	Fig.1			Evolution of the TRPM2 proteins in the Animalia kingdom.
				For details on the chosen sequences, see Fig. 1 - fig. suppl. 1.
	Species				Database no.
	>Salpingoeca rosetta				>XP_004993318.1 Nudt9 protein [Salpingoeca rosetta]
	>Trichoplax adhaerens				>XP_002116621.1 hypothetical protein TRIADDRAFT_60588 [Trichoplax adhaerens]
	>Nematostella vectensis				>pdb|6CO7|A Chain A, Predicted protein
	>Capitella teleta				>ELU00429.1 hypothetical protein CAPTEDRAFT_220620 [Capitella teleta]
	>Strongylocentrotus purpuratus				>XP_011664678.1 PREDICTED: transient receptor potential cation channel subfamily M member 2 isoform X7 [Strongylocentrotus purpuratus]
	>Branchiostoma floridae				>XP_002592165.1 hypothetical protein BRAFLDRAFT_88112 [Branchiostoma floridae]
	>Ciona savignyi				>SINCSAVT00000002961.1 peptide: SINCSAVP00000002778 pep:protein_coding
	>Callorhinchus milii				>XP_007888801.1 PREDICTED: transient receptor potential cation channel subfamily M member 2 isoform X1 [Callorhinchus milii]
	>Danio rerio				>NP_001275746.1 transient receptor potential cation channel subfamily M member 2 [Danio rerio]
	>Xenopus tropicalis				>XP_017952764.1 PREDICTED: transient receptor potential cation channel subfamily M member 2 [Xenopus tropicalis]
	>Pogona vitticeps				>XP_020643158.1 transient receptor potential cation channel subfamily M member 2 [Pogona vitticeps]
	>Coturnix japonica				>XP_015726741.1 PREDICTED: transient receptor potential cation channel subfamily M member 2 [Coturnix japonica]
	>Homo sapiens				>NP_003298.1 transient receptor potential cation channel subfamily M member 2 isoform 1 [Homo sapiens]
