# Supplementary material for: Enzyme activity and selectivity filter stability of ancient TRPM2 channels were simultaneously lost in early vertebrates
Source: eLife. 2019 Apr 2;8:e44556. doi: 10.7554/eLife.44556 (PMC6461439; doi:10.7554/eLife.44556)
Supplement: Figure 2—source data 1. [file elife-44556-fig2-data1.xlsx]

## Sheet: Fig.2
	Fig.2			Enzymatic activity of full-length nvTRPM2 and of the isolated nvNUDT9-H domain.
				For gel filtration (SEC) profiles and SDS PAGE images of the purified proteins, see Fig. 2 - fig. suppl. 1.
	(A) Rates of ADPR hydrolysis by nvTRPM2 (black) and nvNUDT9-H (green) as a function of [ADPR].
	[ADPR]	SEM	nvTRPM2				nvNUDT9-H
	(μM)	(μM)	% rate	SEM	7 experiments		% rate	SEM	3 experiments
	9.03845	0.0641	23.3062	0.620343
	17.7142	0.065511	56.3399	1.4772
	36.8235	0.140344	78.1129	2.39675
	76.2352	0.169481	92.8148	4.17063
	145.909	0.165326	100.751	3.49794
	295.928	0.146477	100	0					<- normalization point
	4.52	0.022					28.8667	3.46667
	9.06	0.116					56.1333	8.39173
	18.62	0.19					79.7333	7.31422
	38.49	0.1					85.3	1.12398
	78.44	0.158					81.4	4.68081
	158	0.079					96.6	2.19393
	317.54	0.11					100	0	<- normalization point
	(B) Estimated kcat values (s−1) for nvTRPM2 (black, calculated per subunit of protein) and nvNUDT9-H (green)
	nvTRPM2						nvNUDT9-H
	Kcat (/s)	SEM	6 experiments				Kcat (/s)	SEM	3 experiments
	40.3	3.2					41.2	1.6
	(C) Mg2+-dependence of kcat (s−1) for nvNUDT9-H, measured in triplicate at 5 different pH values.
	[Mg2+], mM		pH 5.7 (triplicate data)			pH 6.4 (triplicate data)			pH 7.1 (triplicate data)			pH 7.8 (triplicate data)			pH 8.5 (triplicate data)
	0.25		-0.2	0.2	0.4	0.2	0.9	0	1.1	0	1.1	0.5	0.7	0.2	3.8	2.2	3.5
	0.5		0	0	0.2	0.7	0.4	0.2	1.4	0.7	1.1	2.3	2	1.5	7.2	5.5	6.4
	1		0	-0.2	0.4	2.3	1.8	1.3	3.8	2.9	3.3	6.5	5.3	4.2	14.2	13.6	12.1
	2		0	0	0.2	4.1	3.5	2.4	9.7	7.9	7.9	16.4	15.4	11.8	27.9	25.2	22.6	<- used in Panel (D)
	4		0.4	0	0.7	7	9.6	7.2	16.9	19.1	15.8	27	29.8	25.9	34.6	43.4	32.9
	8		1.6	2	1.8	11.8	8.8	7.4	20.5	26.8	26.1	34	43.5	43.5	35.1	48.4	45
	16		1.6	2.3	1.8	7.4	9.9	9.2	21.4	31.3	28.6	35.4	42.3	46.2	38.5	49.8	49.3
	32		2.7	3.4	3.2	9	12.4	12.2	20.5	28.8	29.3	34	41.2	42.3	32.4	41.9	44.8	<- used in Panel (D)
	(D) pH-dependence of kcat (s−1) for nvNUDT9-H, determined at two different fixed free [Mg2+].
	Data from Panel (C) --see indicated lines above-- was used and simply replotted as a function of pH.
