# Supplementary material for: Enzyme activity and selectivity filter stability of ancient TRPM2 channels were simultaneously lost in early vertebrates
Source: eLife. 2019 Apr 2;8:e44556. doi: 10.7554/eLife.44556 (PMC6461439; doi:10.7554/eLife.44556)
Supplement: Figure 3—source data 1. [file elife-44556-fig3-data1.xlsx]

## Sheet: Fig.3
	Fig.3			Enzymatic activity of full-length srTRPM2 and of the isolated srNUDT9-H domain.
				For gel filtration (SEC) profiles and SDS PAGE images of the purified proteins, see Fig. 3 - fig. suppl. 1.
	(A) Rate of ADPR hydrolysis by srTRPM2.
	[ADPR]	SEM	srNUDT9-H
	(μM)	(μM)	% rate	SEM	3 experiments
	2.8	0.15	42.6	2.9
	7.4	0.19	53.9667	5.10044
	17.1	0.04	71.5667	2.96104
	27.1	0.2	74.6	3.06649
	35.5	0.15	76.1667	2.8591
	63.5	0.24	90.6333	1.75246
	78.9	0.08	92.9667	3.23385
	100.4	0.15	98.4333	0.817177
	119.2	0.16	95.1	2.38607
	139.1	0.32	99.5667	2.61683
	158.3	0.19	100	0	<- normalization point
	(B) Mg2+-dependence of kcat (s−1) for srNUDT9-H, measured in triplicate at 2 different pH values.
	[Mg2+], mM		pH 7.1 (triplicate data)			pH 8.5 (triplicate data)
	0		0	0	0	0	0	0
	0.01		0.1	0	0	0	0.1	0.1
	0.032		0.2	0.2	0.2	0.9	0.8	0.8
	0.1		0.9	0.9	0.8	1.5	1.8	1.8
	0.32		1.6	1.6	1.5	1.6	1.6	1.7
	1		1.8	1.9	1.8	1.6	1.7	1.6
	3.2		1.8	1.9	1.8	1.8	1.9	1.8
	10		2.1	2.2	2.1	2.3	2	2.3
	32		2.5	2.7	2.6	2.4	2.6	2.6
	100		3	2.9	3	3	3.2	3.2
	320		3.1	3.4	3.4	2.9	3.6	3.5
	(C) Estimated kcat values (s−1) for full-length srTRPM2 (brown, calculated per subunit of protein) and srNUDT9-H (black).
	srTRPM2				srNUDT9-H
	Kcat (/s)	SEM	11 experiments		Kcat (/s)	SEM	3 experiments
	2	0.1			1.58	0.25
