# Supplementary material for: Enzyme activity and selectivity filter stability of ancient TRPM2 channels were simultaneously lost in early vertebrates
Source: eLife. 2019 Apr 2;8:e44556. doi: 10.7554/eLife.44556 (PMC6461439; doi:10.7554/eLife.44556)
Supplement: Figure 4—source data 1. [file elife-44556-fig4-data1.xlsx]

## Sheet: Fig.4
	Fig.4			Mg2+ removal abolishes hydrolytic activity but does not affect macroscopic gating parameters of nvTRPM2.
				See also Fig. 4 - fig. suppl. 1, 2, 3 (below).
	(A) ADPRase rates of WT nvNUDT9-H.
	SAMPLE				Liberated Pi (μM)			triplicate
	Buffer				0	0	0.54
	Buffer/Mg + CDTA				0	0.27	0
	Buffer/Mg + AMP				0	0.27	0
	Buffer/Mg + ADPR				0.27	0	0.27
	Buffer/Mg + ADPR + AP				2.16	1.89	2.16
	Buffer + ADPR + AP				2.43	2.16	3.24
	Buffer + CDTA + ADPR + AP				2.7	2.16	2.16
	Buffer/Mg + AMP + AP				94.05	96.22	96.22
	Buffer + AMP + AP				91.35	94.59	94.05
	Buffer + CDTA + AMP + AP				94.59	93.51	91.35
	Buffer/Mg + ADPR + AP + nvWT				13.51	15.95	16.22
	Buffer + ADPR + AP + nvWT				2.43	1.62	2.16
	Buffer + CDTA + ADPR + AP + nvWT				1.89	1.62	1.89
	(B) Macroscopic inward currents at -20 mV membrane potential.
	/nvTRPM2 trace/
	(C) Fractional changes in macroscopic (left) and unitary (right) current amplitudes.
							mean	stderr	number
	I relative				with Mg		1	0	11
	(macroscopic)				without Mg		1.7208	0.0455	11
	I at -20mV (absolute) (pA)				with Mg		-2.2099	0.1359	3
	(single channel conductance)				without Mg		-3.7961	0.093	4
	I at -20mV (relative)				with Mg		1	0.0615	3
	(single channel conductance)				without Mg		1.7178	0.0421	4
	(D) Average time constants (mean±SEM from 11 patches) of macroscopic current decay following ADPR removal.
				mean	stderr	number
	tau (ms)	with Mg		86.2212	6.2023	11
		without Mg		80.7428	5.9521	11
	Fig. 4 - fig. suppl. 1				Effects of extra- and intracellular Mg2+ on unitary conductance properties of nvTRPM2.
	(A) Unitary current-voltage (i-V) relationships of nvTRPM2 channels.
		i (pA)		Vm (mV)	mean	stderr	number
		Mg Both side		-80	-12.2269	0.1451	3
				-60	-8.2479	0.1419	3
				-40	-4.2687	0.1815	3
				-20	-1.4505	0.0555	3
				20	1.3398	0.0726	3
				40	3.0934	0.1325	3
				60	5.561	0.1442	3
				80	8.4492	0.2118	3
		Mg in		-80	-17.9233	0.186	3
				-60	-12.0221	0.1724	3
				-40	-6.7613	0.1881	3
				-20	-2.2099	0.1359	3
				20	2.0325	0.0734	3
				40	4.0102	0.0641	3
				60	6.6914	0.1149	3
				80	9.941	0.2195	2
		no Mg		-80	-20.2087	0.0424	4
				-60	-14.5208	0.0937	4
				-40	-9.0173	0.0823	4
				-20	-3.7961	0.093	4
				20	4.531	0.0685	4
				40	9.4746	0.1007	4
				60	14.1727	0.2452	4
				80	19.004	0.3653	3
	Fig. 4 - fig. suppl. 2				nvTRPM2 channels are permeable to Mg2+.
	(A) Unitary current-voltage (i-V) relationships of nvTRPM2 channels.
		i (pA)		Vm (mV)	mean	stderr	number
		Mg2+ outside		-137.431	-4.3527	0.0129	3
				-117.431	-3.7037	0.0121	3
				-97.4306	-3.0755	0.0187	3
				-77.4306	-2.4899	0.0144	3
				-57.4306	-1.9118	0.0166	3
				-37.4306	-1.3971	0.0166	2
		Na+ outside		-80	-20.2087	0.0424	4
				-60	-14.5208	0.0937	4
				-40	-9.0173	0.0823	4
				-20	-3.7961	0.093	4
				20	4.531	0.0685	4
				40	9.4746	0.1007	4
				60	14.1727	0.2452	4
				80	19.004	0.3653	3
	Fig. 4 - fig. suppl. 3				Lack of background currents in uninjected Xenopus laevis oocytes.
	/trace/
