# Supplementary material for: Enzyme activity and selectivity filter stability of ancient TRPM2 channels were simultaneously lost in early vertebrates
Source: eLife. 2019 Apr 2;8:e44556. doi: 10.7554/eLife.44556 (PMC6461439; doi:10.7554/eLife.44556)
Supplement: Figure 5—source data 1. [file elife-44556-fig5-data1.xlsx]

## Sheet: Fig.5
	Fig.5			AMPCPR cannot be hydrolyzed by nvTRPM2, but still activates the channel.
	(A) Nucleoside diphosphohydrolase rates of WT nvNUDT9-H.
	SAMPLE					Liberated Pi (μM)			triplicate
	Buffer/Mg + AP					0.27027	0	0
	Buffer/Mg + AP + ADPR					2.97297	3.24324	2.97297
	Buffer/Mg + AP + AMPCPR					0	0	0.27027
	Buffer/Mg + AP + AMP					95.1351	94.5946	85.1351
	Buffer/Mg + AP + ADPR + 1 nM nvWT					29.7297	31.6216	33.7838
	Buffer/Mg + AP + AMPCPR + 1 nM nvWT					0.810811	0.27027	0.27027
	Buffer/Mg + AP + ADPR + 10 nM nvWT					167.568	165.135	163.243
	Buffer/Mg + AP + AMPCPR + 10 nM nvWT					0	0	0
	(B) Macroscopic nvTRPM2 currents activated by repeated exposures to ADPR.
	/nvTRPM2 trace/
	(C) Fractional current activation by indicated concentrations of AMPCPR.
						mean	stderr	number
	fractional current		ADPR		100 (mM)	1	0	7
	I/(I 100mM ADPR)		AMPCPR		32 (mM)	0.1449	0.0448	4
					100 (mM)	0.309	0.0516	7
					320 (mM)	0.4297	0.0837	5
	(D) Average macroscopic current decay time constants following removal of the activating nucleotide.
						mean	stderr	number
	tau (ms)		100mM ADPR			89.8635	9.2075	6
			320mM AMPCPR			58.3052	5.0305	5
