# Supplementary material for: Enzyme activity and selectivity filter stability of ancient TRPM2 channels were simultaneously lost in early vertebrates
Source: eLife. 2019 Apr 2;8:e44556. doi: 10.7554/eLife.44556 (PMC6461439; doi:10.7554/eLife.44556)
Supplement: Figure 6—source data 1. [file elife-44556-fig6-data1.xlsx]

## Sheet: Fig.6
	Fig.6			Nudix box substitutions impair catalytic activity, but not macroscopic gating properties, of nvTRPM2.
				See also Fig. 6 - fig. suppl. 1 (below).
	(A) Rates of ADPR hydrolysis by nvNUDT9-H (WT and mutants).
	[ADPR], μM		nvWT					5 experiments
	3.8	0.103	55.3	52	56.1	50.9	37.7
	8.4	0.577	70.5	92.1	52	61.1	77.7
	17.6	0.405	92.8	107.2	117.4	78.9	98.1
	27.6	0.411	99.1	98.7	105.9	83.1	99.5
	37.6	0.779	117.4	137.5	71	103.6	103.2
	57.3	0.273	93.7	114.4	111.5	103.9	98.7
	77.2	0.507	98.2	121	101.8	104.2	108.5
	97	0.338	110.7	115.8	115.6	107.2	106.4
	117.3	0.546	103.1	110.5	92.6	91.3	104.2
	137	0.51	119.6	117.1	103	99.7	109.3
	157.1	0.407	100	100	100	100	100	<- normalization point
								nvIL			3 experiments
	3.8	0.135						45.7	50.8	38.7
	7.9	0.039						78.6	76	74.9
	17.5	0.103						92.8	95.4	83.6
	27.3	0.179						104.6	102	87.5
	37.2	0						100.8	100.8	96.2
	57	0.039						106.3	103.7	101.4
	77	0.068						106.6	109.1	99.2
	96.9	0.141						112	101.7	99.5
	116.8	0.135						107.1	112.3	97.3
	136.8	0						104.9	104.9	102
	156.9	0						100	100	100	<- normalization point
											nvKK			3 experiments
	4.6	0.078									40.1	30.1	26.7
	9.3	0.141									68.4	47.5	47.8
	18.9	0.078									95.4	88.8	78.9
	28.8	0.039									98.7	98.6	93.1
	38.7	0.068									107.9	102.1	96.2
	58.6	0.141									120.4	102.8	96.9
	78.5	0.103									115.1	109.8	114.3
	98.4	0.103									115.8	110.5	114.9
	118.5	0.078									98.7	104.9	104.3
	138.4	0									105.3	111.9	99.4
	158.4	0.068									100	100	100	<- normalization point
	(B) Estimated kcat values (s−1) for nvNUDT9-H (WT and mutants).
	nvWT				nvIL				nvKK
	Kcat (/s)	SEM	3 experiments		Kcat (/s)	SEM	3 experiments		Kcat (/s)	SEM	3 experiments
	43.6	2.9			0.377	0.007			0.031	0.001
	(C-E) Macroscopic currents.
	/traces/
	(F) Fractional current activation as a function of [ADPR].
	fractional current: I/(I 100mM ADPR)				ADPR concentration (mM)			mean	stderr	number
	WT					0.1		0.0036859	0.0015497	3
						0.32		0.0521	0.0269	3
						1		0.3231	0.1077	6
						3.2		0.6558	0.0983	3
						10		0.9165	0.0272	3
						32		0.996	0.0055235	3
						100		1	0	6
	E1443I/F1444L					0.1		0.0029321	0.0012052	3
						0.32		0.0369	0.0181	3
						1		0.2696	0.0553	6
						3.2		0.6801	0.0507	3
						10		0.9133	0.016	3
						32		0.9903	0.01	3
						100		1	0	6
	E1446K/E1447K					0.1		0.0015264	0.0005805	3
						0.32		0.0273	0.014	3
						1		0.3791	0.0618	6
						3.2		0.8085	0.0243	3
						10		0.952	0.0121	3
						32		0.9937	0.0043758	3
						100		1	0	6
	(G) Average macroscopic current decay time constants following ADPR removal.
	WT					tau (ms)		107.472	7.3629	6
	EF1443/1444IL					tau (ms)		96.4426	15.9558	6
	EE1446/1447KK					tau (ms)		124.358	8.8944	6
	fit for WT	Parameter	Value	StdErr	concentration	I relative		fit for E1443I/F1444L	Parameter	Value	StdErr	concentration	I relative		fit for E1446K/E1447K	Parameter	Value	StdErr	concentration	I relative
		Vmax	1.0085	0.0487	0.1	0.02			Vmax	1	0.0237	0.1	0.0105			Vmax	0.992	0.0228	0.1	0.0088476
		K	1.8678	0.3515	0.1105	0.0228			K	1.9527	0.1741	0.1133	0.0127			K	1.3371	0.1031	0.1133	0.0111
		n	1.3323	0.2913	0.1221	0.026			n	1.53	0.1732	0.1284	0.0153			n	1.8166	0.2563	0.1284	0.0139
					0.135	0.0296						0.1455	0.0185						0.1455	0.0173
					0.1492	0.0336						0.1649	0.0223						0.1649	0.0217
					0.1649	0.0382						0.1868	0.0268						0.1868	0.027
					0.1822	0.0434						0.2117	0.0323						0.2117	0.0337
					0.2014	0.0493						0.2399	0.0389						0.2399	0.0419
					0.2226	0.056						0.2718	0.0467						0.2718	0.052
					0.246	0.0635						0.308	0.056						0.308	0.0644
					0.2718	0.0718						0.349	0.067						0.349	0.0795
					0.3004	0.0813						0.3955	0.0799						0.3955	0.0978
					0.332	0.0918						0.4482	0.0952						0.4482	0.1197
					0.3669	0.1035						0.5078	0.113						0.5078	0.1458
					0.4055	0.1166						0.5755	0.1336						0.5755	0.1763
					0.4482	0.131						0.6521	0.1573						0.6521	0.2117
					0.4953	0.147						0.7389	0.1844						0.7389	0.252
					0.5474	0.1645						0.8373	0.2149						0.8373	0.297
					0.605	0.1837						0.9488	0.2489						0.9488	0.3462
					0.6686	0.2046						1.0751	0.2864						1.0751	0.399
					0.7389	0.2271						1.2182	0.327						1.2182	0.4542
					0.8166	0.2514						1.3805	0.3704						1.3805	0.5104
					0.9025	0.2774						1.5643	0.416						1.5643	0.5662
					0.9974	0.305						1.7725	0.463						1.7725	0.6203
					1.1023	0.3341						2.0086	0.5108						2.0086	0.6714
					1.2182	0.3645						2.276	0.5583						2.276	0.7186
					1.3464	0.396						2.579	0.6048						2.579	0.7612
					1.488	0.4285						2.9224	0.6495						2.9224	0.799
					1.6445	0.4616						3.3115	0.6917						3.3115	0.8318
					1.8174	0.4951						3.7525	0.7309						3.7525	0.86
					2.0086	0.5286						4.2521	0.7669						4.2521	0.8839
					2.2198	0.562						4.8183	0.7993						4.8183	0.9039
					2.4533	0.5948						5.4598	0.8282						5.4598	0.9205
					2.7113	0.6269						6.1868	0.8538						6.1868	0.9342
					2.9964	0.658						7.0105	0.8761						7.0105	0.9454
					3.3115	0.6878						7.944	0.8954						7.944	0.9545
					3.6598	0.7162						9.0017	0.912						9.0017	0.9619
					4.0447	0.743						10.2003	0.9262						10.2003	0.9679
					4.4701	0.7683						11.5584	0.9382						11.5584	0.9727
					4.9402	0.7918						13.0974	0.9484						13.0974	0.9765
					5.4598	0.8136						14.8413	0.957						14.8413	0.9796
					6.034	0.8337						16.8174	0.9642						16.8174	0.9821
					6.6686	0.8521						19.0566	0.9703						19.0566	0.9841
					7.37	0.8689						21.594	0.9753						21.594	0.9857
					8.1451	0.8842						24.4692	0.9795						24.4692	0.987
					9.0017	0.898						27.7272	0.983						27.7272	0.988
					9.9484	0.9104						31.4191	0.9859						31.4191	0.9888
					10.9947	0.9216						35.6025	0.9884						35.6025	0.9894
					12.151	0.9316						40.3429	0.9904						40.3429	0.99
					13.429	0.9406						45.7145	0.992						45.7145	0.9904
					14.8413	0.9485						51.8013	0.9934						51.8013	0.9907
					16.4022	0.9556						58.6985	0.9946						58.6985	0.991
					18.1272	0.9619						66.5142	0.9955						66.5142	0.9912
					20.0337	0.9675						75.3704	0.9963						75.3704	0.9913
					22.1406	0.9724						85.4059	0.9969						85.4059	0.9915
					24.4692	0.9768						96.7775	0.9975						96.7775	0.9916
					27.0426	0.9806
					29.8867	0.984
					33.03	0.987
					36.5037	0.9896
					40.3429	0.9919
					44.5858	0.994
					49.2749	0.9958
					54.4572	0.9973
					60.1845	0.9987
					66.5142	0.9999
					73.5095	1.001
					81.2406	1.0019
					89.7847	1.0027
					99.2275	1.0034
	Fig. 6 - fig. suppl. 1				Sensitivity of the ADPRase assay allows reliable detection of enzymatic activity for mutant nvNUDT9-H and srNUDT9-H proteins.
	(A) Detected release of Pi (in μM).
	Sample	Released Pi [mM]			triplicate
	ADPR	2.03	2.16	1.89
	nvWT	26.35	29.73	33.11
	nvIL	26.76	27.3	25.95
	nvKK	22.97	23.51	22.16
	srWT	20.53	22.63	21.58
	(B) Thin-layer chromatography visualizing the conversion of 10 mM ADPR into one of the reaction products (AMP).
	/TLC image/
