# Supplementary material for: Enzyme activity and selectivity filter stability of ancient TRPM2 channels were simultaneously lost in early vertebrates
Source: eLife. 2019 Apr 2;8:e44556. doi: 10.7554/eLife.44556 (PMC6461439; doi:10.7554/eLife.44556)
Supplement: Figure 7—source data 1. [file elife-44556-fig7-data1.xlsx]

## Sheet: Fig.7
	Fig.7			Mg2+ removal and Nudix box mutations little affect steady-state single-channel gating kinetics of nvTRPM2 channels.
				See also Fig. 7 - fig. suppl. 1 (below).
	(A-C) Steady-state channel currents.
	/traces/
	(D-F) Open probabilities (D), mean burst (E) and interburst (F) durations obtained from multi-channel fits.
	(D)	Po from eventslist				mean	stderr	number
				WT with Mg		0.7955	0.0659	7
				WT noMg		0.8071	0.0334	7
				E1443I/F1444L		0.7272	0.0414	8
				E1446K/E1447K		0.907	0.031	6
	(E)	T burst (ms)
				WT with Mg		1639.52	570.31	7
				WT noMg		1091.91	106.775	7
				E1443I/F1444L		1989.81	922.4	8
				E1446K/E1447K		2384.22	868.931	6
	(F)	T interburst (ms)
				WT with Mg		261.311	74.5239	7
				WT noMg		166.822	19.9081	7
				E1443I/F1444L		448.11	136.602	8
				E1446K/E1447K		175.868	49.2908	6
	Fig. 7 - fig. suppl. 1				Kinetic analysis of multichannel patches by a simultaneous maximum likelihood fit to the dwell-time histograms of all conductance levels.
	WT with Mg	level	bin	number of events in the bin	fit axis bin	fit axis number of events		level	bin	number of events in the bin	fit axis bin	fit axis number of events		level	bin	number of events in the bin	fit axis bin	fit axis number of events		level	bin	number of events in the bin	fit axis bin	fit axis number of events		level	bin	number of events in the bin	fit axis bin	fit axis number of events		level	bin	number of events in the bin	fit axis bin	fit axis number of events		level	bin	number of events in the bin	fit axis bin	fit axis number of events		level	bin	number of events in the bin	fit axis bin	fit axis number of events
		4	-0.1054	0	-1.1054	0		5	-0.1054	0	-1.1054	0		6	-0.1054	0	-1.1054	0		7	-0.1054	0	-1.1054	0		8	-0.1054	0	-1.1054	0		9	-0.1054	0	-1.1054	0		10	-0.1054	0	-1.1054	0		11	-0.1054	0	-1.1054	0
		4	-0.1054	0	-0.1054	0		5	-0.1054	0	-0.1054	0		6	-0.1054	0	-0.1054	0		7	-0.1054	0	-0.1054	0		8	-0.1054	3	-0.1054	0		9	-0.1054	16	-0.1054	0		10	-0.1054	41	-0.1054	0		11	-0.1054	52	-0.1054	0
		4	0.0613	0	-0.1054	0.00047236		5	0.0613	0	-0.1054	0.0181		6	0.0613	0	-0.1054	0.1553		7	0.0613	0	-0.1054	1.2202		8	0.0613	3	-0.1054	6.445		9	0.0613	16	-0.1054	22.6652		10	0.0613	41	-0.1054	48.0246		11	0.0613	52	-0.1054	47.2457
		4	0.0613	0	-0.022	0.00049942		5	0.0613	0	-0.022	0.0183		6	0.0613	0	-0.022	0.1592		7	0.0613	0	-0.022	1.2508		8	0.0613	0	-0.022	6.6199		9	0.0613	0	-0.022	23.3334		10	0.0613	0	-0.022	49.5714		11	0.0613	0	-0.022	48.962
		4	0.0613	0	0.1446	0.00055353		5	0.0613	0	0.1446	0.0189		6	0.0613	1	0.1446	0.1671		7	0.0613	0	0.1446	1.312		8	0.0613	3	0.1446	6.9696		9	0.0613	23	0.1446	24.6698		10	0.0613	63	0.1446	52.6651		11	0.0613	43	0.1446	52.3947
		4	0.228	0	0.3113	0.0006014		5	0.228	0	0.3113	0.019		6	0.228	1	0.3113	0.172		7	0.228	0	0.3113	1.3509		8	0.228	3	0.3113	7.2048		9	0.228	23	0.3113	25.6199		10	0.228	63	0.3113	54.9904		11	0.228	43	0.3113	55.173
		4	0.228	0	0.478	0.00063875		5	0.228	0	0.478	0.0188		6	0.228	0	0.478	0.1734		7	0.228	0	0.478	1.3621		8	0.228	0	0.478	7.2963		9	0.228	0	0.478	26.0749		10	0.228	0	0.478	56.306		11	0.228	0	0.478	57.0596
		4	0.228	0	0.6446	0.00066161		5	0.228	0	0.6446	0.0181		6	0.228	0	0.6446	0.1708		7	0.228	0	0.6446	1.3423		8	0.228	8	0.6446	7.2229		9	0.228	29	0.6446	25.9509		10	0.228	56	0.6446	56.4153		11	0.228	68	0.6446	57.8542
		4	0.3946	0	0.8113	0.00066727		5	0.3946	0	0.8113	0.017		6	0.3946	0	0.8113	0.1641		7	0.3946	0	0.8113	1.2906		8	0.3946	8	0.8113	6.9774		9	0.3946	29	0.8113	25.2105		10	0.3946	56	0.8113	55.2162		11	0.3946	68	0.8113	57.4419
		4	0.3946	0	0.978	0.00065523		5	0.3946	0	0.978	0.0156		6	0.3946	0	0.978	0.1537		7	0.3946	0	0.978	1.2099		8	0.3946	0	0.978	6.5721		9	0.3946	0	0.978	23.8861		10	0.3946	0	0.978	52.753		11	0.3946	0	0.978	55.8482
		4	0.3946	0	1.1446	0.00062792		5	0.3946	0	1.1446	0.014		6	0.3946	1	1.1446	0.1405		7	0.3946	1	1.1446	1.1073		8	0.3946	9	1.1446	6.0427		9	0.3946	24	1.1446	22.0954		10	0.3946	72	1.1446	49.2571		11	0.3946	50	1.1446	53.2844
		4	0.5613	0	1.3113	0.00059067		5	0.5613	0	1.3113	0.0123		6	0.5613	1	1.3113	0.126		7	0.5613	1	1.3113	0.9939		8	0.5613	9	1.3113	5.4478		9	0.5613	24	1.3113	20.0429		10	0.5613	72	1.3113	45.1575		11	0.5613	50	1.3113	50.1651
		4	0.5613	0	1.478	0.00055083		5	0.5613	0	1.478	0.0107		6	0.5613	0	1.478	0.1119		7	0.5613	0	1.478	0.8834		8	0.5613	0	1.478	4.8616		9	0.5613	0	1.478	17.9988		10	0.5613	0	1.478	41.0407		11	0.5613	0	1.478	47.0755
		4	0.5613	0	1.6446	0.00051597		5	0.5613	0	1.6446	0.0094266		6	0.5613	0	1.6446	0.1		7	0.5613	1	1.6446	0.7895		8	0.5613	5	1.6446	4.3616		9	0.5613	29	1.6446	16.2514		10	0.5613	66	1.6446	37.5532		11	0.5613	72	1.6446	44.6799
		4	0.728	0	1.8113	0.00049164		5	0.728	0	1.8113	0.0084888		6	0.728	0	1.8113	0.0914		7	0.728	1	1.8113	0.7228		8	0.728	5	1.8113	4.0098		9	0.728	29	1.8113	15.0435		10	0.728	66	1.8113	35.2606		11	0.728	72	1.8113	43.5804
		4	0.728	0	1.978	0.00047965		5	0.728	0	1.978	0.0079396		6	0.728	0	1.978	0.0867		7	0.728	0	1.978	0.688		8	0.728	0	1.978	3.8372		9	0.728	0	1.978	14.5093		10	0.728	0	1.978	34.5044		11	0.728	0	1.978	44.1696
		4	0.728	0	2.1446	0.0004775		5	0.728	0	2.1446	0.0077183		6	0.728	0	2.1446	0.0855		7	0.728	0	2.1446	0.6823		8	0.728	5	2.1446	3.8352		9	0.728	15	2.1446	14.6398		10	0.728	60	2.1446	35.3159		11	0.728	67	2.1446	46.5338
		4	0.8946	0	2.3113	0.00047943		5	0.8946	0	2.3113	0.0076992		6	0.8946	0	2.3113	0.0865		7	0.8946	0	2.3113	0.6971		8	0.8946	5	2.3113	3.9602		9	0.8946	15	2.3113	15.2938		10	0.8946	60	2.3113	37.4294		11	0.8946	67	2.3113	50.4535
		4	0.8946	0	2.478	0.00047843		5	0.8946	0	2.478	0.0077303		6	0.8946	0	2.478	0.0881		7	0.8946	0	2.478	0.7203		8	0.8946	0	2.478	4.1487		9	0.8946	0	2.478	16.2501		10	0.8946	0	2.478	40.3879		11	0.8946	0	2.478	55.4994
		4	0.8946	0	2.6446	0.00046834		5	0.8946	0	2.6446	0.0076752		6	0.8946	0	2.6446	0.0891		7	0.8946	1	2.6446	0.7401		8	0.8946	3	2.6446	4.3352		9	0.8946	14	2.6446	17.2715		10	0.8946	54	2.6446	43.6809		11	0.8946	49	2.6446	61.1643
		4	1.0613	0				5	1.0613	0				6	1.0613	0				7	1.0613	1	2.8113	0.747		8	1.0613	3	2.8113	4.4648		9	1.0613	14	2.8113	18.1503		10	1.0613	54	2.8113	46.8429		11	1.0613	49	2.8113	66.9591
		4	1.0613	0				5	1.0613	0				6	1.0613	0				7	1.0613	0	2.978	0.7345		8	1.0613	0	2.978	4.4964		9	1.0613	0	2.978	18.7202		10	1.0613	0	2.978	49.4789		11	1.0613	0	2.978	72.4351
		4	1.0613	0				5	1.0613	0				6	1.0613	0				7	1.0613	1	3.1446	0.6991		8	1.0613	5	3.1446	4.402		9	1.0613	16	3.1446	18.851		10	1.0613	41	3.1446	51.2451		11	1.0613	37	3.1446	77.155
		4	1.228	0				5	1.228	0				6	1.228	0				7	1.228	1	3.3113	0.6399		8	1.228	5	3.3113	4.1661		9	1.228	16	3.3113	18.4442		10	1.228	41	3.3113	51.8309		11	1.228	37	3.3113	80.6631
		4	1.228	0				5	1.228	0				6	1.228	0				7	1.228	0	3.478	0.5594		8	1.228	0	3.478	3.788		9	1.228	0	3.478	17.4418		10	1.228	0	3.478	50.9719		11	1.228	0	3.478	82.4868
		4	1.228	0				5	1.228	0				6	1.228	0				7	1.228	0	3.6446	0.4631		8	1.228	1	3.6446	3.2852		9	1.228	16	3.6446	15.8438		10	1.228	54	3.6446	48.4923		11	1.228	45	3.6446	82.178
		4	1.3946	0				5	1.3946	0				6	1.3946	0				7	1.3946	0	3.8113	0.3596		8	1.3946	1	3.8113	2.6946		9	1.3946	16	3.8113	13.7253		10	1.3946	54	3.8113	44.363		11	1.3946	45	3.8113	79.3855
		4	1.3946	0				5	1.3946	0				6	1.3946	0				7	1.3946	0	3.978	0.2589		8	1.3946	0	3.978	2.0694		9	1.3946	0	3.978	11.2428		10	1.3946	0	3.978	38.7539		11	1.3946	0	3.978	73.9484
		4	1.3946	0				5	1.3946	0				6	1.3946	0				7	1.3946	2	4.1446	0.1705		8	1.3946	4	4.1446	1.4707		9	1.3946	12	4.1446	8.621		10	1.3946	34	4.1446	32.0593		11	1.3946	46	4.1446	65.9894
		4	1.5613	0				5	1.5613	0				6	1.5613	0				7	1.5613	2	4.3113	0.1011		8	1.5613	4	4.3113	0.9539		9	1.5613	12	4.3113	6.1156		10	1.5613	34	4.3113	24.871		11	1.5613	46	4.3113	55.979
		4	1.5613	0				5	1.5613	0				6	1.5613	0				7	1.5613	0	4.478	0.053		8	1.5613	0	4.478	0.5556		9	1.5613	0	4.478	3.9581		10	1.5613	0	4.478	17.8869		11	1.5613	0	4.478	44.7334
		4	1.5613	0				5	1.5613	0				6	1.5613	0				7	1.5613	1				8	1.5613	2	4.6446	0.285		9	1.5613	14	4.6446	2.2994		10	1.5613	46	4.6446	11.7653		11	1.5613	40	4.6446	33.3155
		4	1.728	0				5	1.728	0				6	1.728	0				7	1.728	1				8	1.728	2				9	1.728	14	4.8113	1.1761		10	1.728	46	4.8113	6.9661		11	1.728	40	4.8113	22.8347
		4	1.728	0				5	1.728	0				6	1.728	0				7	1.728	0				8	1.728	0				9	1.728	0	4.978	0.5179		10	1.728	0	4.978	3.644		11	1.728	0	4.978	14.1921
		4	1.728	0				5	1.728	0				6	1.728	0				7	1.728	0				8	1.728	7				9	1.728	19	5.1446	0.1912		10	1.728	47	5.1446	1.6476		11	1.728	48	5.1446	7.8603
		4	1.8946	0				5	1.8946	0				6	1.8946	0				7	1.8946	0				8	1.8946	7				9	1.8946	19				10	1.8946	47	5.3113	0.6275		11	1.8946	48	5.3113	3.801
		4	1.8946	0				5	1.8946	0				6	1.8946	0				7	1.8946	0				8	1.8946	0				9	1.8946	0				10	1.8946	0				11	1.8946	0	5.478	1.5668
		4	1.8946	0				5	1.8946	0				6	1.8946	0				7	1.8946	0				8	1.8946	4				9	1.8946	17				10	1.8946	39				11	1.8946	49	5.6446	0.5352
		4	2.0613	0				5	2.0613	0				6	2.0613	0				7	2.0613	0				8	2.0613	4				9	2.0613	17				10	2.0613	39				11	2.0613	49	5.8113	0.1466
		4	2.0613	0				5	2.0613	0				6	2.0613	0				7	2.0613	0				8	2.0613	0				9	2.0613	0				10	2.0613	0				11	2.0613	0	5.978	0.031
		4	2.0613	0				5	2.0613	0				6	2.0613	0				7	2.0613	0				8	2.0613	5				9	2.0613	13				10	2.0613	52				11	2.0613	54	6.1446	0.0048341
		4	2.228	0				5	2.228	0				6	2.228	0				7	2.228	0				8	2.228	5				9	2.228	13				10	2.228	52				11	2.228	54
		4	2.228	0				5	2.228	0				6	2.228	0				7	2.228	0				8	2.228	0				9	2.228	0				10	2.228	0				11	2.228	0
		4	2.228	0				5	2.228	0				6	2.228	0				7	2.228	0				8	2.228	2				9	2.228	15				10	2.228	44				11	2.228	48
		4	2.3946	0				5	2.3946	0				6	2.3946	0				7	2.3946	0				8	2.3946	2				9	2.3946	15				10	2.3946	44				11	2.3946	48
		4	2.3946	0				5	2.3946	0				6	2.3946	0				7	2.3946	0				8	2.3946	0				9	2.3946	0				10	2.3946	0				11	2.3946	0
		4	2.3946	0				5	2.3946	0				6	2.3946	1				7	2.3946	1				8	2.3946	5				9	2.3946	19				10	2.3946	45				11	2.3946	63
		4	2.5613	0				5	2.5613	0				6	2.5613	1				7	2.5613	1				8	2.5613	5				9	2.5613	19				10	2.5613	45				11	2.5613	63
		4	2.5613	0				5	2.5613	0				6	2.5613	0				7	2.5613	0				8	2.5613	0				9	2.5613	0				10	2.5613	0				11	2.5613	0
		4	2.5613	0				5	2.5613	0				6	2.5613	1				7	2.5613	2				8	2.5613	3				9	2.5613	26				10	2.5613	50				11	2.5613	68
		4	2.728	0				5	2.728	0				6	2.728	1				7	2.728	2				8	2.728	3				9	2.728	26				10	2.728	50				11	2.728	68
		4	2.728	0				5	2.728	0				6	2.728	0				7	2.728	0				8	2.728	0				9	2.728	0				10	2.728	0				11	2.728	0
		4						5						6						7	2.728	1				8	2.728	5				9	2.728	18				10	2.728	53				11	2.728	74
		4						5						6						7	2.8946	1				8	2.8946	5				9	2.8946	18				10	2.8946	53				11	2.8946	74
		4						5						6						7	2.8946	0				8	2.8946	0				9	2.8946	0				10	2.8946	0				11	2.8946	0
		4						5						6						7	2.8946	1				8	2.8946	3				9	2.8946	23				10	2.8946	50				11	2.8946	75
		4						5						6						7	3.0613	1				8	3.0613	3				9	3.0613	23				10	3.0613	50				11	3.0613	75
		4						5						6						7	3.0613	0				8	3.0613	0				9	3.0613	0				10	3.0613	0				11	3.0613	0
		4						5						6						7	3.0613	1				8	3.0613	1				9	3.0613	16				10	3.0613	42				11	3.0613	96
		4						5						6						7	3.228	1				8	3.228	1				9	3.228	16				10	3.228	42				11	3.228	96
		4						5						6						7	3.228	0				8	3.228	0				9	3.228	0				10	3.228	0				11	3.228	0
		4						5						6						7	3.228	0				8	3.228	1				9	3.228	9				10	3.228	54				11	3.228	71
		4						5						6						7	3.3946	0				8	3.3946	1				9	3.3946	9				10	3.3946	54				11	3.3946	71
		4						5						6						7	3.3946	0				8	3.3946	0				9	3.3946	0				10	3.3946	0				11	3.3946	0
		4						5						6						7	3.3946	1				8	3.3946	1				9	3.3946	16				10	3.3946	43				11	3.3946	84
		4						5						6						7	3.5613	1				8	3.5613	1				9	3.5613	16				10	3.5613	43				11	3.5613	84
		4						5						6						7	3.5613	0				8	3.5613	0				9	3.5613	0				10	3.5613	0				11	3.5613	0
		4						5						6						7	3.5613	0				8	3.5613	5				9	3.5613	8				10	3.5613	43				11	3.5613	79
		4						5						6						7	3.728	0				8	3.728	5				9	3.728	8				10	3.728	43				11	3.728	79
		4						5						6						7	3.728	0				8	3.728	0				9	3.728	0				10	3.728	0				11	3.728	0
		4						5						6						7	3.728	1				8	3.728	3				9	3.728	15				10	3.728	50				11	3.728	85
		4						5						6						7	3.8946	1				8	3.8946	3				9	3.8946	15				10	3.8946	50				11	3.8946	85
		4						5						6						7	3.8946	0				8	3.8946	0				9	3.8946	0				10	3.8946	0				11	3.8946	0
		4						5						6						7	3.8946	0				8	3.8946	1				9	3.8946	6				10	3.8946	36				11	3.8946	70
		4						5						6						7	4.0613	0				8	4.0613	1				9	4.0613	6				10	4.0613	36				11	4.0613	70
		4						5						6						7	4.0613	0				8	4.0613	0				9	4.0613	0				10	4.0613	0				11	4.0613	0
		4						5						6						7	4.0613	0				8	4.0613	0				9	4.0613	7				10	4.0613	30				11	4.0613	62
		4						5						6						7	4.228	0				8	4.228	0				9	4.228	7				10	4.228	30				11	4.228	62
		4						5						6						7	4.228	0				8	4.228	0				9	4.228	0				10	4.228	0				11	4.228	0
		4						5						6						7	4.228	0				8	4.228	0				9	4.228	5				10	4.228	28				11	4.228	54
		4						5						6						7	4.3946	0				8	4.3946	0				9	4.3946	5				10	4.3946	28				11	4.3946	54
		4						5						6						7	4.3946	0				8	4.3946	0				9	4.3946	0				10	4.3946	0				11	4.3946	0
		4						5						6						7	4.3946	1				8	4.3946	1				9	4.3946	6				10	4.3946	18				11	4.3946	48
		4						5						6						7	4.5613	1				8	4.5613	1				9	4.5613	6				10	4.5613	18				11	4.5613	48
		4						5						6						7	4.5613	0				8	4.5613	0				9	4.5613	0				10	4.5613	0				11	4.5613	0
		4						5						6						7						8	4.5613	1				9	4.5613	3				10	4.5613	17				11	4.5613	40
		4						5						6						7						8	4.728	1				9	4.728	3				10	4.728	17				11	4.728	40
		4						5						6						7						8	4.728	0				9	4.728	0				10	4.728	0				11	4.728	0
		4						5						6						7						8						9	4.728	0				10	4.728	12				11	4.728	23
		4						5						6						7						8						9	4.8946	0				10	4.8946	12				11	4.8946	23
		4						5						6						7						8						9	4.8946	0				10	4.8946	0				11	4.8946	0
		4						5						6						7						8						9	4.8946	2				10	4.8946	10				11	4.8946	23
		4						5						6						7						8						9	5.0613	2				10	5.0613	10				11	5.0613	23
		4						5						6						7						8						9	5.0613	0				10	5.0613	0				11	5.0613	0
		4						5						6						7						8						9	5.0613	1				10	5.0613	2				11	5.0613	12
		4						5						6						7						8						9	5.228	1				10	5.228	2				11	5.228	12
		4						5						6						7						8						9	5.228	0				10	5.228	0				11	5.228	0
		4						5						6						7						8						9						10	5.228	1				11	5.228	10
		4						5						6						7						8						9						10	5.3946	1				11	5.3946	10
		4						5						6						7						8						9						10	5.3946	0				11	5.3946	0
		4						5						6						7						8						9						10						11	5.3946	2
		4						5						6						7						8						9						10						11	5.5613	2
		4						5						6						7						8						9						10						11	5.5613	0
		4						5						6						7						8						9						10						11	5.5613	3
		4						5						6						7						8						9						10						11	5.728	3
		4						5						6						7						8						9						10						11	5.728	0
		4						5						6						7						8						9						10						11	5.728	1
		4						5						6						7						8						9						10						11	5.8946	1
		4						5						6						7						8						9						10						11	5.8946	0
		4						5						6						7						8						9						10						11	5.8946	0
		4						5						6						7						8						9						10						11	6.0613	0
		4						5						6						7						8						9						10						11	6.0613	0
		4						5						6						7						8						9						10						11	6.0613	1
		4						5						6						7						8						9						10						11	6.228	1
		4						5						6						7						8						9						10						11	6.228	0
[truncated: 123 more columns]
