# Supplementary material for: Enzyme activity and selectivity filter stability of ancient TRPM2 channels were simultaneously lost in early vertebrates
Source: eLife. 2019 Apr 2;8:e44556. doi: 10.7554/eLife.44556 (PMC6461439; doi:10.7554/eLife.44556)
Supplement: Figure 8—source data 1. [file elife-44556-fig8-data1.xlsx]

## Sheet: Fig.8
	Fig.8			Pore structure and inactivation properties of invertebrate and vertebrate TRPM2 channels.
	(A) Superposition of nvTRPM2 (salmon, PDBID: 6CO7) and hsTRPM2 (cyan, PDBID: 6MIX) pore structures.
	/PyMOL generated image/				http://www.pymol.org
	(B-E) Macroscopic currents of (B) srTRPM2, (C) nvTRPM2, (D) drTRPM2, and (E) hsTRPM2 channels.
	rundown (tau in ms)					mean	stderr	number
				nvTRPM2		29208.8	2195.2	4
				drTRPM2		655310	179711	12
